# Supplementary material
Source: publisher figshare collection journal article supplement (https://asha.figshare.com/articles/dataset/_/19326419)
Supplement: Supplementary file 1 [file 1]

**Supplemental Material S4.** Intercorrelations among the perceptual rating scales.

|                             | <b>A</b> | <b>B</b> | <b>C</b> | <b>D</b> | <b>E</b> | <b>F</b> | <b>G</b> | <b>H</b> |
|-----------------------------|----------|----------|----------|----------|----------|----------|----------|----------|
| <b>A. FLUENCY</b>           | 1.000    | .690     | .649     | .573     | .572     | .690     | .519     | .497     |
| <b>B. SPEECH RATE</b>       |          | 1.000    | .712     | .592     | .685     | .674     | .454     | .424     |
| <b>C. PAUSING</b>           |          |          | 1.000    | .532     | .603     | .681     | .428     | .505     |
| <b>D. EFFORT</b>            |          |          |          | 1.000    | .630     | .596     | .493     | .395     |
| <b>E. MELODY</b>            |          |          |          |          | 1.000    | .658     | .523     | .430     |
| <b>F. PHRASE LENGTH</b>     |          |          |          |          |          | 1.000    | .675     | .624     |
| <b>G. GRAMMATICALITY</b>    |          |          |          |          |          |          | 1.000    | .606     |
| <b>H. LEXICAL RETRIEVAL</b> |          |          |          |          |          |          |          | 1.000    |

*Note.* All correlations are significant at  $p < .0001$ .
