# Supplementary material
Source: publisher figshare collection journal article supplement (https://asha.figshare.com/articles/dataset/_/19326419)
Supplement: Supplementary file 3 [file 1]

## Supplemental Material S1. Survey instrument.

**Instructions for Version A [or Version B]:** You will be asked to listen to 20 [or 10] different speech samples and to rate each of them on several dimensions. We expect this to take about 1 and a half hours [or 45 minutes] in total (samples vary in length, averaging about 3 minutes each). You may stop and start the survey if you need to, but we request that you complete all the samples within two weeks.

Please make sure you are in a quiet environment with minimal distractions. Ideally, you should listen to the samples over headphones. You will be able to play the sample as many times as you like, and to rate the sample as you listen. However, once you finish rating a sample and move on to the next one, you will not be able to go back to modify your responses to the previous samples.

| ID                  |            |                                                                                       |
|---------------------|------------|---------------------------------------------------------------------------------------|
| Standard Attributes | Label Type | ID Numeric                                                                            |
| Recorded_date       |            |                                                                                       |
| Standard Attributes | Label Type | Recorded Date Numeric                                                                 |
| Q1                  |            |                                                                                       |
| Standard Attributes | Label Type | How old are you? Numeric                                                              |
| Valid Values        | 1          | 20-30                                                                                 |
|                     | 2          | 31-40                                                                                 |
|                     | 3          | 41-50                                                                                 |
|                     | 4          | 51-60                                                                                 |
|                     | 5          | 61-70                                                                                 |
|                     | 6          | 71-80                                                                                 |
|                     | 7          | 81-90                                                                                 |
|                     | 9          | Prefer not to answer                                                                  |
| Q2                  |            |                                                                                       |
| Standard Attributes | Label Type | What is the highest level of education have you completed? Numeric                    |
| Valid Values        | 1          | BA/BS degree                                                                          |
|                     | 2          | MA/MS degree                                                                          |
|                     | 3          | PhD                                                                                   |
|                     | 8          | Other (please specify)                                                                |
|                     | Type       | String                                                                                |
|                     | 9          | Prefer not to answer                                                                  |
| Q4                  |            |                                                                                       |
| Standard Attributes | Label Type | What kind of facility do you work in? Numeric                                         |
| Valid Values        | 1          | acute-care hospital                                                                   |
|                     | 2          | rehab facility                                                                        |
|                     | 3          | long-term care facility                                                               |
|                     | 4          | private practice                                                                      |
|                     | 5          | university clinic                                                                     |
|                     | 8          | other (please specify)                                                                |
|                     | Type       | String                                                                                |
| Q5                  |            |                                                                                       |
| Standard Attributes | Label Type | How long have you been practicing as a certified speech-language pathologist? Numeric |

|        |      |                        |
|--------|------|------------------------|
| Valid  | 1    | < 1 year               |
| Values | 2    | 1-5 years              |
|        | 3    | 5-10 years             |
|        | 4    | 10-20 years            |
|        | 5    | > 20 years             |
|        | 8    | other (please explain) |
|        | Type | String                 |

#### Q6

|            |       |                                                                                             |
|------------|-------|---------------------------------------------------------------------------------------------|
| Standard   | Label | <b>Approximately what proportion of your caseload consists of individuals with aphasia?</b> |
| Attributes | Type  | Numeric                                                                                     |
| Valid      | 1     | 1-20%                                                                                       |
| Values     | 2     | 21-40%                                                                                      |
|            | 3     | 41-60%                                                                                      |
|            | 4     | 61-80%                                                                                      |
|            | 5     | 81-100%                                                                                     |
|            | 8     | other (please explain)                                                                      |
|            | Type  | String                                                                                      |

#### Q7

|            |       |                                                                                                             |
|------------|-------|-------------------------------------------------------------------------------------------------------------|
| Standard   | Label | <b>Approximately how many individuals with aphasia have you interacted with in a professional capacity?</b> |
| Attributes | Type  | Numeric                                                                                                     |
| Valid      | 1     | 1-9                                                                                                         |
| Values     | 2     | 10-20                                                                                                       |
|            | 3     | 21-50                                                                                                       |
|            | 4     | 51-100                                                                                                      |
|            | 5     | >100                                                                                                        |
|            | 8     | other (please explain)                                                                                      |
|            | Type  | String                                                                                                      |

#### Practice\_a

|            |       |                                                      |
|------------|-------|------------------------------------------------------|
| Standard   | Label | <b>How fluent is the speaker during this sample?</b> |
| Attributes | Type  | Numeric                                              |
| Valid      | 0     | Very nonfluent                                       |
| Values     | 100   | Hyperfluent                                          |
|            | 999   | Unable to judge                                      |

#### Practice\_b

|            |       |                                                                     |
|------------|-------|---------------------------------------------------------------------|
| Standard   | Label | <b>How slow is the speaker's rate of speech during this sample?</b> |
| Attributes | Type  | Numeric                                                             |
| Labeled    | 0     | Very slow                                                           |
| Values     | 100   | Abnormally fast rate                                                |
|            | 999   | Unable to judge                                                     |

#### Practice\_c

|            |       |                                                   |
|------------|-------|---------------------------------------------------|
| Standard   | Label | <b>How much of the sample consists of pauses?</b> |
| Attributes | Type  | Numeric                                           |
| Valid      | 0     | A large proportion                                |
| Values     | 100   | A normal proportion                               |
|            | 999   | Unable to judge                                   |

| Practice_d                                                |       |                                                                                                 |
|-----------------------------------------------------------|-------|-------------------------------------------------------------------------------------------------|
| Standard                                                  | Label | <b>How effortful is the speaker's articulation during this sample?</b>                          |
| Attributes                                                | Type  | Numeric                                                                                         |
| Labeled                                                   | 0     | Very effortful                                                                                  |
| Values                                                    | 100   | Not effortful at all                                                                            |
|                                                           | 999   | Unable to judge                                                                                 |
| Practice_e                                                |       |                                                                                                 |
| Standard                                                  | Label | <b>How restricted is the speaker's melodic line or intonational contour during this sample?</b> |
| Attributes                                                | Type  | Numeric                                                                                         |
| Valid                                                     | 0     | Very limited                                                                                    |
| Values                                                    | 100   | Normal variability                                                                              |
|                                                           | 999   | Unable to judge                                                                                 |
| Practice_f                                                |       |                                                                                                 |
| Standard                                                  | Label | <b>How restricted is the speaker's typical phrase length during this sample?</b>                |
| Attributes                                                | Type  | Numeric                                                                                         |
| Labeled                                                   | 0     | Very limited                                                                                    |
| Values                                                    | 100   | Normal variability                                                                              |
|                                                           | 999   | Unable to judge                                                                                 |
| Practice_g                                                |       |                                                                                                 |
| Standard                                                  | Label | <b>How grammatical is the speaker during this sample?</b>                                       |
| Attributes                                                | Type  | Numeric                                                                                         |
| Valid                                                     | 0     | Very agrammatic                                                                                 |
| Values                                                    | 100   | Normally grammatical                                                                            |
|                                                           | 999   | Unable to judge                                                                                 |
| Practice_h                                                |       |                                                                                                 |
| Standard                                                  | Label | <b>How limited is the speaker's word retrieval during this sample?</b>                          |
| Attributes                                                | Type  | Numeric                                                                                         |
| Valid                                                     | 0     | Very limited                                                                                    |
| Values                                                    | 100   | No limitation                                                                                   |
|                                                           | 999   | Unable to judge                                                                                 |
| <i>(Same 8 questions repeated for 20 [or 10] samples)</i> |       |                                                                                                 |
| Q8                                                        |       |                                                                                                 |
| Standard                                                  | Label | <b>In the clinic, how would you usually measure or assess fluency in aphasia?</b>               |
| Attributes                                                | Type  | Numeric                                                                                         |
| Valid                                                     | 1     | by calculating speech rate                                                                      |
| Values                                                    | 2     | by calculating phrase length                                                                    |
|                                                           | 3     | by measuring some aspect(s) of grammatical competence                                           |
|                                                           | 4     | by assessing articulatory effort                                                                |
|                                                           | 5     | by measuring word retrieval abilities                                                           |
|                                                           | 6     | by using the WAB Spontaneous Speech Scores                                                      |
|                                                           | 7     | by making a subjective judgement based on one or more of the above dimensions                   |
|                                                           | 8     | other (please specify)                                                                          |
|                                                           | Type  | String                                                                                          |
| Valid                                                     | 9     | I don't measure or assess fluency                                                               |
| Values                                                    |       |                                                                                                 |

**Q9: Of the methods you selected above, please rank them in order of importance, starting with 1 as the most important.**

**Q9\_1**

| Standard   | Label | By calculating speech rate |
|------------|-------|----------------------------|
| Attributes | Type  | Numeric - Ranking          |
| Valid      | 1     | Most important             |
| Values     | 2     | 2nd in importance          |
|            | 3     | 3rd in importance          |
|            | 4     | 4th in importance          |
|            | 5     | 5th in importance          |
|            | 6     | 6th in importance          |
|            | 7     | 7th in importance          |
|            | 8     | 8th in importance          |

**Q9\_2**

| Standard   | Label | By calculating phrase length |
|------------|-------|------------------------------|
| Attributes | Type  | Numeric - Ranking            |
| Valid      | 1     | Most important               |
| Values     | 2     | 2nd in importance            |
|            | 3     | 3rd in importance            |
|            | 4     | 4th in importance            |
|            | 5     | 5th in importance            |
|            | 6     | 6th in importance            |
|            | 7     | 7th in importance            |
|            | 8     | 8th in importance            |

**Q9\_3**

| Standard   | Label | By measuring some aspect(s) of grammatical competence |
|------------|-------|-------------------------------------------------------|
| Attributes | Type  | Numeric - Ranking                                     |
| Valid      | 1     | Most important                                        |
| Values     | 2     | 2nd in importance                                     |
|            | 3     | 3rd in importance                                     |
|            | 4     | 4th in importance                                     |
|            | 5     | 5th in importance                                     |
|            | 6     | 6th in importance                                     |
|            | 7     | 7th in importance                                     |
|            | 8     | 8th in importance                                     |

**Q9\_4**

| Standard   | Label | By assessing articulatory effort |
|------------|-------|----------------------------------|
| Attributes | Type  | Numeric - Ranking                |
| Valid      | 1     | Most important                   |
| Values     | 2     | 2nd in importance                |
|            | 3     | 3rd in importance                |
|            | 4     | 4th in importance                |
|            | 5     | 5th in importance                |
|            | 6     | 6th in importance                |
|            | 7     | 7th in importance                |
|            | 8     | 8th in importance                |

### Q9\_5

| Standard   | Label | <b>By measuring word retrieval abilities</b> |
|------------|-------|----------------------------------------------|
| Attributes | Type  | Numeric - Ranking                            |
| Valid      | 1     | Most important                               |
| Values     | 2     | 2nd in importance                            |
|            | 3     | 3rd in importance                            |
|            | 4     | 4th in importance                            |
|            | 5     | 5th in importance                            |
|            | 6     | 6th in importance                            |
|            | 7     | 7th in importance                            |
|            | 8     | 8th in importance                            |

### Q9\_6

| Standard   | Label | <b>By using the WAB Spontaneous Speech Scores</b> |
|------------|-------|---------------------------------------------------|
| Attributes | Type  | Numeric - Ranking                                 |
| Valid      | 1     | Most important                                    |
| Values     | 2     | 2nd in importance                                 |
|            | 3     | 3rd in importance                                 |
|            | 4     | 4th in importance                                 |
|            | 5     | 5th in importance                                 |
|            | 6     | 6th in importance                                 |
|            | 7     | 7th in importance                                 |
|            | 8     | 8th in importance                                 |

### Q9\_7

| Standard   | Label | <b>By making a subjective judgement based on one or more of the above dimensions</b> |
|------------|-------|--------------------------------------------------------------------------------------|
| Attributes | Type  | Numeric - Ranking                                                                    |
| Valid      | 1     | Most important                                                                       |
| Values     | 2     | 2nd in importance                                                                    |
|            | 3     | 3rd in importance                                                                    |
|            | 4     | 4th in importance                                                                    |
|            | 5     | 5th in importance                                                                    |
|            | 6     | 6th in importance                                                                    |
|            | 7     | 7th in importance                                                                    |
|            | 8     | 8th in importance                                                                    |

### Q9\_8

| Standard   | Label | <b>Other</b>      |
|------------|-------|-------------------|
| Attributes | Type  | Numeric - Ranking |
| Valid      | 1     | Most important    |
| Values     | 2     | 2nd in importance |
|            | 3     | 3rd in importance |
|            | 4     | 4th in importance |
|            | 5     | 5th in importance |
|            | 6     | 6th in importance |
|            | 7     | 7th in importance |
|            | 8     | 8th in importance |

**Q10**

|            |       |                                                                                                   |
|------------|-------|---------------------------------------------------------------------------------------------------|
| Standard   | Label | <b>Do you think it is important to develop a more reliable way to measure fluency in aphasia?</b> |
| Attributes | Type  |                                                                                                   |
| Valid      | 0     |                                                                                                   |
| Values     | 100   | Not important at all                                                                              |
|            |       | Very important                                                                                    |

**Q11**

|            |       |                                                                                  |
|------------|-------|----------------------------------------------------------------------------------|
| Standard   | Label | <b>Please add any suggestions, feedback, or other comments in the box below.</b> |
| Attributes | Type  |                                                                                  |
|            |       | String                                                                           |
