# Supplementary material
Source: publisher figshare collection journal article supplement (https://asha.figshare.com/articles/dataset/_/19326419)
Supplement: Supplementary file 4 [file 1]

**Supplemental Material S5.** Statistical comparisons of dimensions used (top) and importance assigned to dimensions (bottom) by different subsets of respondents (*Analysis 3a*). Significant effects are shown in bold.

| Group                                                                                        | N  | Rate | MLU  | Gram | Artic | Lex  | WAB  | Subj | Other* | None* |
|----------------------------------------------------------------------------------------------|----|------|------|------|-------|------|------|------|--------|-------|
| <b>Distribution of dimensions used</b>                                                       |    |      |      |      |       |      |      |      |        |       |
| <b>Comparison by years of experience</b> (chi-square = 3.61, <i>df</i> = 6, <i>p</i> = .730) |    |      |      |      |       |      |      |      |        |       |
| 0-10 years                                                                                   | 35 | 15   | 13   | 13   | 19    | 20   | 13   | 29   | 0      | 3     |
| >10 years                                                                                    | 55 | 22   | 32   | 22   | 25    | 26   | 15   | 38   | 5      | 7     |
| <b>Comparison by caseload</b> (chi-square = 3.99, <i>df</i> = 6, <i>p</i> = .679)            |    |      |      |      |       |      |      |      |        |       |
| 0-20% PwA                                                                                    | 45 | 19   | 20   | 18   | 17    | 19   | 9    | 31   | 2      | 9     |
| >20% PwA                                                                                     | 45 | 18   | 25   | 17   | 27    | 27   | 19   | 36   | 3      | 1     |
| <b>Comparison by no. PwA seen</b> (chi-square = 1.49, <i>df</i> = 6, <i>p</i> = .960)        |    |      |      |      |       |      |      |      |        |       |
| 1-50 PwA                                                                                     | 44 | 19   | 17   | 17   | 18    | 20   | 12   | 30   | 2      | 8     |
| >51 PwA                                                                                      | 46 | 18   | 28   | 18   | 26    | 26   | 16   | 37   | 3      | 2     |
| <b>Comparison by education level</b> (chi-square = 6.94, <i>df</i> = 6, <i>p</i> = .326)     |    |      |      |      |       |      |      |      |        |       |
| MA/MS                                                                                        | 77 | 34   | 37   | 29   | 36    | 38   | 20   | 60   | 4      | 9     |
| PhD                                                                                          | 13 | 3    | 8    | 6    | 8     | 8    | 8    | 7    | 1      | 1     |
| <b>Comparison by work setting</b> (chi-square = 5.65, <i>df</i> = 6, <i>p</i> = .463)        |    |      |      |      |       |      |      |      |        |       |
| Inpatient                                                                                    | 25 | 10   | 11   | 8    | 12    | 14   | 12   | 21   | 0      | 2     |
| Outpatient                                                                                   | 50 | 4    | 6    | 6    | 6     | 6    | 6    | 6    | 6      | 5     |
| *Because of small values, these categories were not included in the chi-square analyses.     |    |      |      |      |       |      |      |      |        |       |
| <b>Importance assigned &amp; total dimensions used</b>                                       |    |      |      |      |       |      |      |      |        |       |
| <b>Comparison by years of experience</b>                                                     |    |      |      |      |       |      |      |      |        |       |
| 0-10 years                                                                                   | 35 | 3.1  | 3.5  | 4.2  | 3.2   | 2.5  | 2.1  | 2.3  | 0.0    | 3.5   |
| >10 years                                                                                    | 55 | 2.9  | 3.5  | 3.7  | 3.2   | 2.5  | 2.7  | 2.4  | 2.4    | 3.2   |
| <i>t</i> -test <i>p</i> -values                                                              |    | .697 | .944 | .321 | .947  | .924 | .362 | .758 | NA     | .467  |
| <b>Comparison by caseload</b>                                                                |    |      |      |      |       |      |      |      |        |       |
| 0-20% PwA                                                                                    | 45 | 2.8  | 3.7  | 3.6  | 3.0   | 2.4  | 2.9  | 2.4  | 4.0    | 3.0   |
| >20% PwA                                                                                     | 45 | 3.1  | 3.4  | 4.1  | 3.4   | 2.5  | 2.2  | 2.4  | 1.3    | 3.8   |
| <i>t</i> -test <i>p</i> -values                                                              |    | .550 | .580 | .347 | .399  | .828 | .460 | .997 | .201   | .080  |
| <b>Comparison by no. PwA seen</b>                                                            |    |      |      |      |       |      |      |      |        |       |
| 1-50 PwA                                                                                     | 44 | 2.6  | 3.9  | 4.2  | 2.8   | 2.7  | 3.2  | 2.5  | 3.0    | 3.1   |
| >51 PwA                                                                                      | 46 | 3.3  | 3.3  | 3.5  | 3.5   | 2.3  | 1.9  | 2.3  | 2.0    | 3.7   |
| <i>t</i> -test <i>p</i> -values                                                              |    | .225 | .192 | .172 | .143  | .494 | .114 | .554 | .705   | .187  |
| <b>Comparison by education level</b>                                                         |    |      |      |      |       |      |      |      |        |       |
| MA/MS                                                                                        | 77 | 3.0  | 3.6  | 3.9  | 3.2   | 2.3  | 2.7  | 2.4  | 2.8    | 3.4   |
| PhD                                                                                          | 13 | 2.0  | 3.1  | 3.8  | 3.5   | 3.3  | 1.8  | 2.4  | 1.0    | 3.8   |
| <i>t</i> -test <i>p</i> -values                                                              |    | .001 | .508 | .974 | .562  | .133 | .108 | .947 | NA     | .497  |
| <b>Comparison by work setting</b>                                                            |    |      |      |      |       |      |      |      |        |       |
| Inpatient                                                                                    | 25 | 2.6  | 3.4  | 4.3  | 3.3   | 2.4  | 1.9  | 2.9  | NA     | 3.52  |
| Outpatient                                                                                   | 50 | 3.1  | 3.7  | 4.0  | 2.9   | 2.1  | 3.9  | 2.2  | 2.7    | 3.28  |
| <i>t</i> -test <i>p</i> -values                                                              |    | .345 | .607 | .531 | .447  | .461 | .046 | .219 | NA     | .662  |
