# Supplementary material
Source: publisher figshare collection journal article supplement (https://asha.figshare.com/articles/dataset/_/19326419)
Supplement: Supplementary file 5 [file 1]

**Supplemental Material S3.** Final set of PwA from AphasiaBank (see text for details).

| PwA Code       | Age | Sex | WAB Type | Clin Type | Final Type | WAB AQ | WAB Fluency |
|----------------|-----|-----|----------|-----------|------------|--------|-------------|
| ACWT01a        | 69  | F   | BRO      | ANO       | ANO        | 63.9   | 2           |
| ACWT02a        | 53  | F   | TCM      | BRO       | BRO        | 74.6   | 4           |
| ACWT08a        | 39  | F   | BRO      | BRO       | BRO        | 40.5   | 1           |
| ACWT09a        | 56  | F   | CON      | BRO       | BRO        | 80.1   | 8           |
| ACWT10a        | 48  | M   | WER      | BRO       | BRO        | 57.4   | 5           |
| ACWT12a        | 83  | F   | CON      | CON       | CON        | 79.5   | 8           |
| adler01a       | 58  | M   | ANO      | ANO       | ANO        | 86.8   | 8           |
| adler04a       | 75  | F   | TCM      | BRO       | BRO        | 72.6   | 4           |
| adler05a       | 68  | F   | CON      | CON       | CON        | 65.5   | 6           |
| adler06a       | 70  | M   | WER      | GLO       | BRO        | 28.2   | 5           |
| adler08a       | 56  | M   | ANO      | ANO       | ANO        | 78.5   | 8           |
| adler11a       | 80  | M   | BRO      | GLO       | BRO        | 17     | 0           |
| adler12a       | 40  | F   | ANO      | ANO       | ANO        | 87.2   | 9           |
| adler14a       | 71  | M   | CON      | CON       | CON        | 83     | 9           |
| adler15a       | 78  | M   | CON      | CON       | CON        | 72.3   | 8           |
| adler16a       | 63  | M   | BRO      | BRO       | BRO        | 57.2   | 2           |
| adler17a       | 85  | M   | ANO      | ANO       | ANO        | 86.8   | 9           |
| adler18a       | 71  | M   | TCM      | TCM       | TCM        | 59.8   | 2           |
| adler19a       | 81  | M   | BRO      | GLO       | BRO        | 19.7   | 1           |
| adler20a       | 75  | M   | ANO      | ANO       | ANO        | 79.1   | 7           |
| adler23a       | 81  | M   | WER      | WER       | WER        | 46.8   | 8           |
| adler24a       | 65  | M   | ANO      | ANO       | ANO        | 75.8   | 6           |
| BU01a          | 62  | M   | ANO      | ANO       | ANO        | 85.7   | 9           |
| BU02a          | 66  | F   | TCM      | TCM       | TCM        | 63.5   | 4           |
| BU03a          | 58  | M   | CON      | CON       | CON        | 77.9   | 6           |
| BU06a          | 52  | M   | ANO      | ANO       | ANO        | 90.6   | 8           |
| BU07a          | 52  | M   | BRO      | BRO       | BRO        | 51.5   | 4           |
| BU08a          | 64  | M   | BRO      | BRO       | BRO        | 39.7   | 2           |
| BU09a          | 78  | M   | CON      | CON       | CON        | 65.3   | 8           |
| BU12a          | 54  | F   | ANO      | ANO       | ANO        | 91.2   | 9           |
| cmu02b         | 42  | M   | BRO      | BRO       | BRO        | 59.6   | 4           |
| cmu03a         | 83  | F   | ANO      | ANO       | ANO        | 88.3   | 9           |
| elman01a       | 55  | M   | CON      | CON       | CON        | 76.3   | 6           |
| elman02a       | 81  | F   | CON      | BRO       | BRO        | 61.7   | 5           |
| elman05a       | 48  | M   | ANO      | ANO       | ANO        | 85.7   | 9           |
| elman06a       | 76  | F   | BRO      | BRO       | BRO        | 45.5   | 4           |
| elman07a       | 65  | M   | ANO      | BRO       | BRO        | 63.4   | 5           |
| elman09a       | 58  | F   | BRO      | BRO       | BRO        | 57.8   | 4           |
| elman10a       | 59  | F   | ANO      | ANO       | ANO        | 93.2   | 9           |
| elman12a       | 57  | M   | WER      | WER       | WER        | 74.4   | 8           |
| elman13a       | 76  | M   | ANO      | ANO       | ANO        | 78.3   | 6           |
| elman14a       | 76  | F   | WER      | CON       | CON        | 65.7   | 8           |
| elman15a       | 68  | F   | ANO      | NA        | ANO        | 86.9   | 8           |
| fridriksson02a | 61  | M   | ANO      | ANO       | ANO        | 87.9   | 6           |

| PwA Code       | Age | Sex | WAB Type | Clin Type | Final Type | WAB AQ | WAB Fluency |
|----------------|-----|-----|----------|-----------|------------|--------|-------------|
| fridriksson03a | 46  | F   | BRO      | BRO       | BRO        | 46.2   | 4           |
| fridriksson04a | 75  | M   | ANO      | NA        | ANO        | 84.2   | 5           |
| fridriksson05a | 58  | F   | ANO      | ANO       | ANO        | 92.7   | 9           |
| Fridriksson06a | 50  | M   | CON      | BRO       | BRO        | 49     | 5           |
| fridriksson09a | 63  | M   | ANO      | BRO       | BRO        | 90.2   | 9           |
| fridriksson10a | 64  | M   | BRO      | BRO       | BRO        | 61.2   | 4           |
| fridriksson12a | 47  | F   | BRO      | BRO       | BRO        | 57.5   | 4           |
| fridriksson13a | 55  | M   | CON      | BRO       | BRO        | 72.6   | 5           |
| kansas10a      | 77  | M   | CON      | CON       | CON        | 61.4   | 8           |
| kansas12a      | NA  | M   | WER      | BRO       | BRO        | 46.2   | 5           |
| kansas13a      | 43  | F   | CON      | CON       | CON        | 70.4   | 5           |
| kansas14a      | 77  | F   | WER      | CON       | CON        | 67.4   | 8           |
| kansas15a      | 69  | M   | ANO      | ANO       | ANO        | 91.5   | 9           |
| kansas17a      | 54  | M   | TCM      | BRO       | BRO        | 71.9   | 4           |
| kansas18a      | 69  | F   | ANO      | ANO       | ANO        | 89     | 9           |
| kansas19a      | 66  | F   | ANO      | ANO       | ANO        | 86.7   | 9           |
| kansas20a      | 55  | M   | CON      | CON       | CON        | 61.6   | 6           |
| kansas22a      | 45  | F   | CON      | CON       | CON        | 67.5   | 6           |
| kansas23a      | 75  | F   | WER      | CON       | CON        | 54.7   | 6           |
| kempler02a     | 55  | F   | ANO      | ANO       | ANO        | 78.5   | 6           |
| kempler03a     | 64  | M   | BRO      | BRO       | BRO        | 60.7   | 4           |
| kurland03a     | 81  | F   | ANO      | ANO       | ANO        | 83.6   | 6           |
| kurland07a     | 70  | F   | ANO      | ANO       | ANO        | 83     | 6           |
| kurland08a     | 67  | F   | ANO      | ANO       | ANO        | 92.2   | 8           |
| kurland10a     | 77  | F   | ANO      | ANO       | ANO        | 85.1   | 8           |
| kurland12a     | 63  | M   | ANO      | ANO       | ANO        | 89.1   | 8           |
| kurland13a     | 55  | M   | BRO      | MTC       | BRO        | 54     | 4           |
| kurland14a     | 63  | M   | CON      | WER       | WER        | 75.5   | 7           |
| kurland15a     | 61  | M   | BRO      | GLO       | BRO        | 10.8   | 0           |
| kurland16a     | 70  | M   | WER      | WER       | WER        | 37.1   | 7           |
| kurland17a     | 55  | F   | ANO      | OPT       | ANO        | 80.2   | 6           |
| kurland19a     | 70  | F   | BRO      | BRO       | BRO        | 67.2   | 4           |
| kurland20a     | 50  | F   | CON      | CON       | CON        | 67     | 6           |
| kurland21a     | 64  | F   | ANO      | ANO       | ANO        | 81.8   | 5           |
| kurland22a     | 80  | M   | BRO      | BRO       | BRO        | 36.2   | 1.5         |
| kurland24a     | 47  | M   | BRO      | ANO       | ANO        | 51.5   | 4           |
| kurland25a     | 68  | M   | ANO      | TCS       | ANO        | 81.4   | 8           |
| kurland26a     | 74  | F   | ANO      | ANO       | ANO        | 90     | 9           |
| kurland27a     | 63  | F   | ANO      | ANO       | ANO        | 74.9   | 6           |
| kurland28a     | 62  | M   | ANO      | ANO       | ANO        | 78.7   | 6           |
| kurland29a     | 60  | M   | BRO      | BRO       | BRO        | 58.2   | 3.5         |
| MSU01a         | 79  | M   | ANO      | ANO       | ANO        | 89.6   | 9           |
| MSU04a         | 80  | M   | CON      | CON       | CON        | 77.4   | 6           |
| MSU05b         | 72  | M   | BRO      | BRO       | BRO        | 68.2   | 5           |
| MSU07a         | 25  | F   | BRO      | BRO       | BRO        | 61.4   | 4           |
| scale01a       | 78  | M   | BRO      | BRO       | BRO        | 52.5   | 4           |

| PwA Code    | Age | Sex | WAB Type | Clin Type | Final Type | WAB AQ | WAB Fluency |
|-------------|-----|-----|----------|-----------|------------|--------|-------------|
| scale02a    | 57  | M   | ANO      | NA        | ANO        | 70.6   | 5           |
| scale04a    | 61  | F   | CON      | BRO       | BRO        | 72.8   | 5           |
| scale05a    | 63  | M   | TCM      | BRO       | BRO        | 73.2   | 4           |
| scale06a    | 41  | M   | CON      | NA        | CON        | 82.3   | 9           |
| scale10a    | 44  | M   | BRO      | NA        | BRO        | 63.5   | 4           |
| scale11a    | 90  | F   | CON      | WER       | WER        | 65.9   | 7           |
| scale14c    | 67  | M   | ANO      | ANO       | ANO        | 66.4   | 5           |
| scale15a    | 58  | M   | CON      | BRO       | BRO        | 68.3   | 6           |
| scale22a    | 73  | M   | ANO      | ANO       | ANO        | 90.4   | 9           |
| scale23a    | 57  | F   | CON      | CON       | CON        | 64.5   | 6           |
| scale25a    | 52  | F   | BRO      | NA        | BRO        | 42.7   | 4           |
| scale26a    | 58  | M   | BRO      | BRO       | BRO        | 64.8   | 4           |
| scale30a    | 48  | M   | ANO      | ANO       | ANO        | 68.5   | 5           |
| scale31a    | 64  | M   | BRO      | BRO       | BRO        | 51.5   | 4           |
| scale32a    | 69  | M   | ANO      | ANO       | ANO        | 82.8   | 9           |
| scale33a    | 57  | F   | BRO      | BRO       | BRO        | 71.1   | 4           |
| scale34a    | 42  | M   | ANO      | ANO       | ANO        | 88.4   | 9           |
| scale36a    | 55  | M   | BRO      | BRO       | BRO        | 66.3   | 4           |
| scale38a    | 70  | M   | WER      | NA        | WER        | 63.8   | 6           |
| star03a     | 85  | M   | ANO      | ANO       | ANO        | 75.1   | 6           |
| tap01a      | 68  | M   | ANO      | TCM       | TCM        | 93.3   | 9           |
| tap02a      | 58  | F   | CON      | BRO       | BRO        | 61.6   | 5           |
| tap05a      | 41  | F   | ANO      | TCM       | TCM        | 79.4   | 9           |
| tap08a      | 54  | F   | ANO      | ANO       | ANO        | 68.7   | 8           |
| tap10a      | 63  | M   | CON      | ANO       | ANO        | 67.8   | 8           |
| tap11a      | 62  | F   | BRO      | BRO       | BRO        | 58.1   | 4           |
| tap16a      | 42  | M   | BRO      | BRO       | BRO        | 56.7   | 4           |
| tap17a      | 65  | F   | BRO      | TCM       | TCM        | 59.5   | 4           |
| tap18a      | 53  | F   | ANO      | BRO       | BRO        | 90.3   | 9           |
| tcu01a      | 46  | F   | ANO      | BRO       | BRO        | 84.2   | 9           |
| tcu07a      | 49  | F   | CON      | BRO       | BRO        | 52     | 6           |
| tcu08a      | 57  | M   | BRO      | BRO       | BRO        | 63.9   | 4           |
| thompson02a | 47  | F   | ANO      | TCM       | TCM        | 86.5   | 9           |
| thompson04a | 79  | F   | ANO      | ANO       | ANO        | 74.4   | 5           |
| thompson07a | 69  | M   | ANO      | BRO       | BRO        | 93.4   | 8           |
| thompson09a | 73  | F   | TCM      | NA        | TCM        | 79.3   | 4           |
| thompson12a | 32  | F   | ANO      | BRO       | BRO        | 85     | 9           |
| thompson13a | 64  | M   | ANO      | ANO       | ANO        | 88.7   | 9           |
| tucson02a   | 53  | M   | BRO      | NA        | BRO        | 38.8   | 2           |
| tucson03a   | 46  | F   | WER      | WER       | WER        | 34.5   | 7           |
| tucson06a   | 71  | M   | ANO      | NA        | ANO        | 89.6   | 8           |
| tucson07a   | 72  | M   | ANO      | NA        | ANO        | 73.3   | 6           |
| tucson08a   | 56  | F   | CON      | CON       | CON        | 73.4   | 5           |
| tucson10a   | 51  | M   | ANO      | ANO       | ANO        | 77.1   | 5           |
| tucson12a   | 72  | M   | CON      | CON       | CON        | 49.5   | 6           |
| tucson14a   | 53  | F   | BRO      | BRO       | BRO        | 40.9   | 4           |

| PwA Code      | Age | Sex | WAB Type | Clin Type | Final Type | WAB AQ | WAB Fluency |
|---------------|-----|-----|----------|-----------|------------|--------|-------------|
| tucson15a     | 74  | M   | WER      | CON       | CON        | 43.1   | 7           |
| tucson20a     | 63  | M   | ANO      | ANO       | ANO        | 78.3   | 8           |
| tucson22a     | 57  | F   | TCM      | BRO       | BRO        | 72     | 4           |
| UNH02a        | 57  | M   | BRO      | BRO       | BRO        | 21.4   | 1           |
| UNH03a        | 76  | M   | ANO      | ANO       | ANO        | 88.4   | 6           |
| UNH05a        | 68  | M   | ANO      | ANO       | ANO        | 90.7   | 9           |
| UNH06a        | 77  | F   | CON      | CON       | CON        | 79.4   | 8           |
| whiteside01a  | 71  | M   | ANO      | ANO       | ANO        | 84     | 9           |
| whiteside02a  | 74  | F   | CON      | CON       | CON        | 60.7   | 6           |
| whiteside03a  | 74  | F   | BRO      | BRO       | BRO        | 47.2   | 2           |
| whiteside04a  | 65  | M   | BRO      | BRO       | BRO        | 50     | 4           |
| whiteside05a  | 30  | F   | CON      | CON       | CON        | 82.1   | 9           |
| whiteside06a  | 62  | M   | ANO      | BRO       | BRO        | 88.8   | 8           |
| whiteside07a  | 52  | M   | ANO      | ANO       | ANO        | 90.8   | 9           |
| whiteside08a  | 37  | M   | BRO      | BRO       | BRO        | 54.7   | 2           |
| whiteside09a  | 53  | M   | ANO      | BRO       | BRO        | 78.7   | 5           |
| whiteside11a  | 30  | F   | BRO      | BRO       | BRO        | 72.8   | 4           |
| whiteside13a  | 49  | F   | ANO      | ANO       | ANO        | 91.9   | 9           |
| whiteside16a  | 46  | F   | BRO      | WER       | WER        | 53.4   | 4           |
| whiteside19a  | 50  | M   | ANO      | CON       | CON        | 87.4   | 9           |
| whiteside20a  | 55  | F   | CON      | CON       | CON        | 88.4   | 9           |
| williamson01a | 66  | F   | CON      | NA        | CON        | 70.9   | 6           |
| williamson02a | 59  | M   | ANO      | ANO       | ANO        | 89.2   | 9           |
| williamson03a | 72  | M   | CON      | WER       | WER        | 62.5   | 5           |
| williamson04a | 60  | M   | CON      | CON       | CON        | 70.6   | 8           |
| williamson06a | 88  | F   | CON      | WER       | WER        | 61.1   | 9           |
| williamson09a | 61  | F   | CON      | NA        | CON        | 90     | 9           |
| williamson12a | 42  | M   | BRO      | NA        | BRO        | 64.4   | 4           |
| williamson14a | 65  | M   | CON      | BRO       | BRO        | 77.5   | 9           |
| williamson15a | 55  | M   | ANO      | BRO       | BRO        | 85.3   | 6           |
| williamson16a | 63  | F   | TCS      | WER       | WER        | 66.4   | 8           |
| williamson18a | 60  | F   | ANO      | ANO       | ANO        | 85.6   | 8           |
| williamson19a | 52  | F   | BRO      | BRO       | BRO        | 69.4   | 4           |
| williamson23a | 60  | M   | WER      | WER       | WER        | 36.8   | 8           |
| williamson24a | 63  | F   | ANO      | BRO       | BRO        | 74.8   | 6           |
| wozniak01a    | 54  | F   | ANO      | NA        | ANO        | 93.4   | 9           |
| wozniak02a    | NA  | F   | CON      | NA        | CON        | 78.8   | 6           |
| wozniak04a    | 79  | M   | ANO      | NA        | ANO        | 84.5   | 9           |
| wozniak05a    | 66  | M   | ANO      | BRO       | BRO        | 76.6   | 5           |
| wozniak07a    | 68  | M   | ANO      | NA        | ANO        | 74.7   | 5           |
| wright201a    | 55  | M   | BRO      | BRO       | BRO        | 57.6   | 4           |
| wright202a    | 63  | F   | ANO      | ANO       | ANO        | 89.5   | 9           |
| wright203a    | 66  | M   | CON      | CON       | CON        | 76.3   | 6           |
| wright204a    | 74  | M   | ANO      | ANO       | ANO        | 90.9   | 8           |
| wright205a    | 55  | M   | BRO      | BRO       | BRO        | 59.7   | 4           |
